# Supplementary material
Source: PubMed Central journal article supplement (PMC3418672)
Supplement: NIHMS79347-supplement-Tables_1_and_2.pdf [file NIHMS79347-supplement-Tables_1_and_2.pdf]

**Table1: *H. pylori* strains used and their characteristic virulence factors**

| <b><i>H. pylori</i> strains</b>                | <b>Virulence Factors</b>                                                                                                                               |
|------------------------------------------------|--------------------------------------------------------------------------------------------------------------------------------------------------------|
| <b>60190</b><br>*(isogenic mutants CagA, CagE) | -s1/m1 isoform of <i>vacA</i> toxin<br>- <i>cag</i> pathogenicity island (CagPAI) positive                                                             |
| <b>251</b><br>*(isogenic mutant CagM)          | -unknown <i>vacA</i> isoform<br>-Cag PAI positive<br>-genetics of bacterial strain remains largely unknown                                             |
| <b>G27</b><br>*(isogenic EPISA mutant)         | -Cag PAI positive<br>-five EPIYA tyrosine phosphorylation motifs repeated within <i>cagA</i> gene<br>-s1/m1 <i>b</i> isoform                           |
| <b>7.13</b><br>*(isogenic 7.13 CagA mutant)    | -rodent adapted form of <i>H. pylori</i> B128 strain<br>-developed via passage through gerbil model<br>-Cag PAI positive<br>-s1/m1 <i>vacA</i> isoform |

\* isogenic mutants to corresponding wildtype bacterial strain indicated in the representative table

**Table 2: Concentration of cytokines detected in cells**

| Treatment                 | Concentration (pg/ml) |       |     |
|---------------------------|-----------------------|-------|-----|
|                           | IL-6                  | IL-11 | LIF |
| Control                   | ND                    | ND    | ND  |
| <i>H. pylori</i> infected | 19.22                 | ND    | ND  |
