# Supplementary material
Source: PubMed Central journal article supplement (PMC3418672)

A

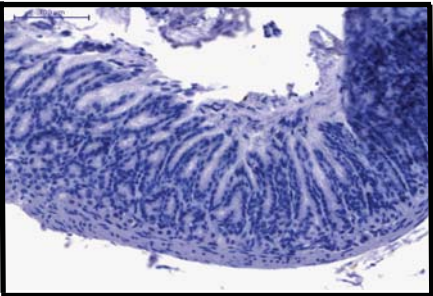

B

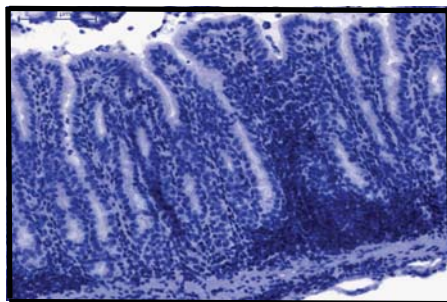

C

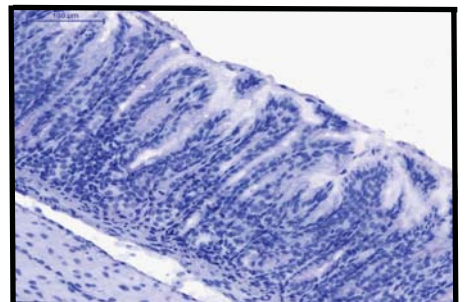

Supplement: NIHMS79347-supplement-Supp_figure_11.pdf [file NIHMS79347-supplement-Supp_figure_11.pdf]

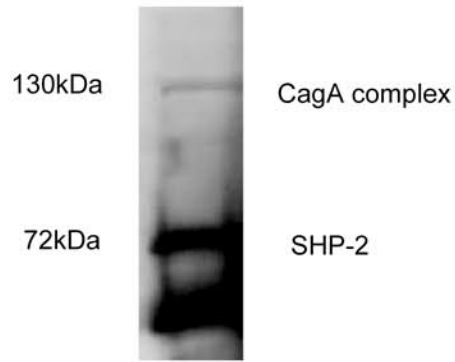

Suppl. Fig. 7

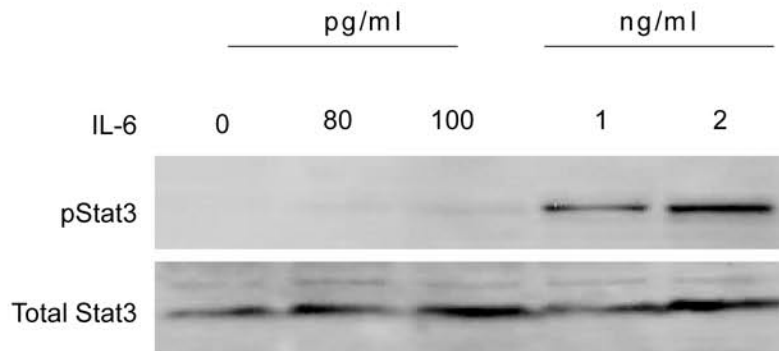

Suppl. Fig. 8

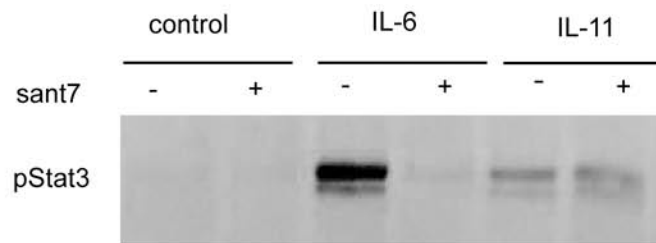

Suppl. Fig. 9

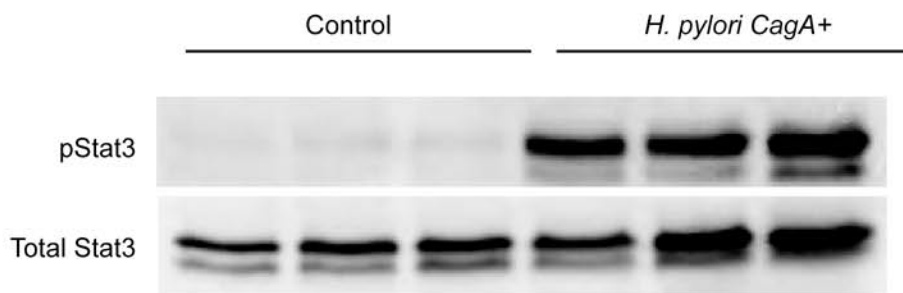

Suppl. Fig. 10

Supplement: NIHMS79347-supplement-Supp_figure_7-.pdf [file NIHMS79347-supplement-Supp_figure_7-.pdf]

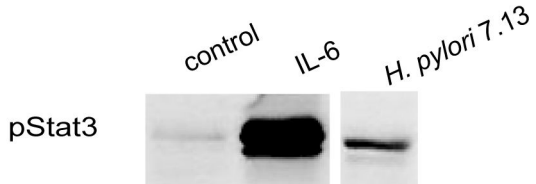

Suppl. Fig. 1

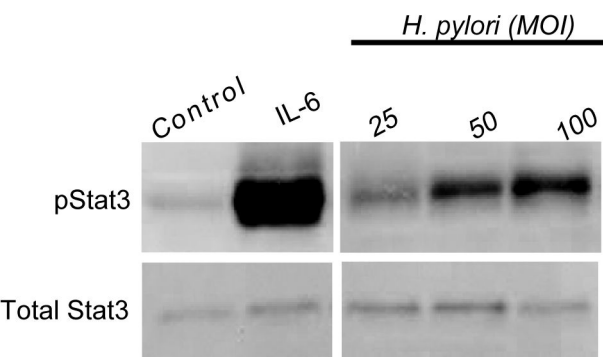

Suppl. Fig. 2

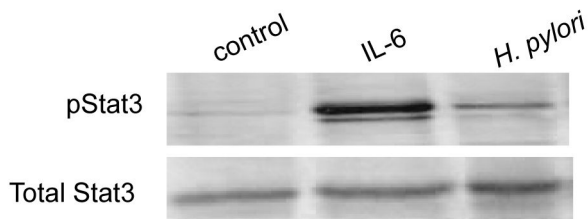

Suppl. Fig. 3

Supplement: NIHMS79347-supplement-Suppl_Figures.pdf [file NIHMS79347-supplement-Suppl_Figures.pdf]

A

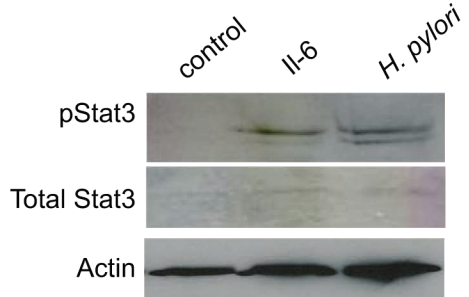

B

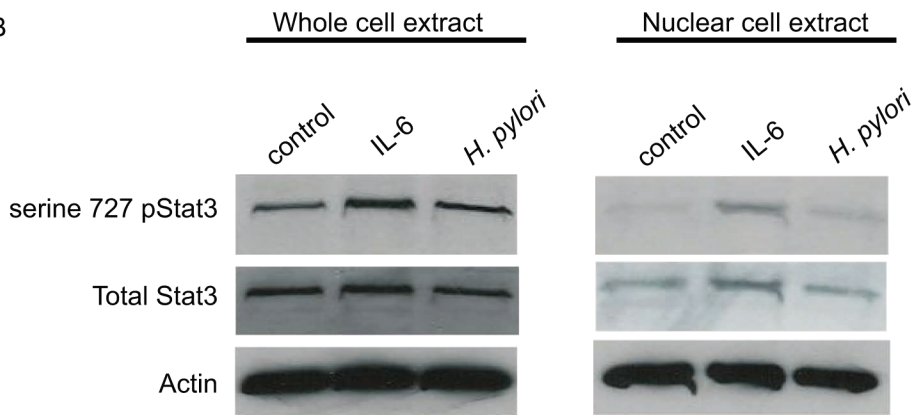

Suppl. Fig 4

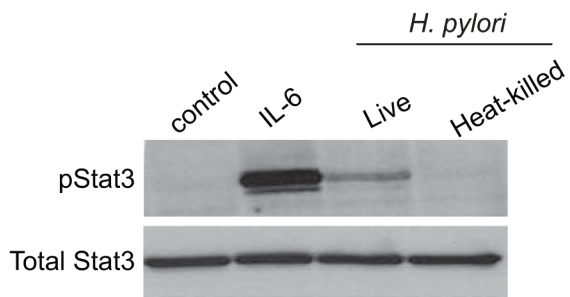

Suppl. Fig 5

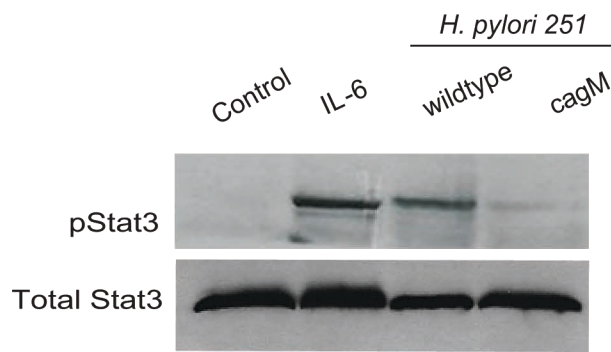

Suppl. Fig. 6

Supplement: NIHMS79347-supplement-Supplementary.pdf [file NIHMS79347-supplement-Supplementary.pdf]
